# Supplementary material
Source: MDPI journal article supplement (https://www.mdpi.com/2624-8549/4/4/78)
Supplement: s1 [file s1 › chemistry-1878174-supplementary.pdf]

# Sweet, sugar-coated hierarchical platinum nanostructures for easy support, heterogenization and separation

Dennis Woitassek <sup>1,†</sup>, José G. Moya-Cancino <sup>1,†</sup>, Yangyang Sun <sup>1</sup>, Yefan Song <sup>1</sup>, Dennis Woschko <sup>1</sup>, Stefan Roitsch <sup>2</sup> and Christoph Janiak <sup>1,\*</sup>

---

Keywords: ionic liquids; platinum; carbohydrates; hierarchical nanostructures; supported nanoparticles; hydrosilylation; sugar; saccharide

## Table of Contents

### Section

S1 Sources of chemicals

S2 Characterization of the ionic liquid 1-butyl-3-methylimidazoliumbis(trifluoromethylsulfonyl)imide ([BMIm]NTf<sub>2</sub>)

S3 Synthesis parameters and analyses of sugar-coated platinum nanostructures (SC-Pt-NS) in 1-butyl-3-methylimidazoliumbis(trifluoromethylsulfonyl)imide ([BMIm]NTf<sub>2</sub>)

S4 Fourier-transform infrared (FTIR) spectroscopy measurements

S5 MALDI-TOF mass spectrometry

S6 Effect of water in the synthesis of platinum nanoparticles in IL

S7 Carbohydrate-free platinum nanoparticles synthesized in 1-butyl-3-methylimidazolium-bis(trifluoromethylsulfonyl)imide ([BMIm]NTf<sub>2</sub>)

S8 Analysis of thermally treated sugars in IL

S9 Hydrosilylation activity and product analysis

S10 Gas chromatography (GC) analysis

## S1 Sources of chemicals

**Table S1** Sources for starting materials and solvents.

| Items                                                                                                 | Manufacturer    |
|-------------------------------------------------------------------------------------------------------|-----------------|
| Hexachloridoplatinic acid hexahydrate ( $\text{H}_2\text{PtCl}_6 \cdot 6\text{H}_2\text{O}$ , Pt-38%) | TCI             |
| Sucrose ( $\text{C}_{12}\text{H}_{22}\text{O}_{11}$ )                                                 | household sugar |
| D(-)-fructose ( $\text{C}_6\text{H}_{12}\text{O}_6$ , $\geq 99.5\%$ )                                 | Carl Roth       |
| Acetonitrile ( $\geq 99.9\%$ )                                                                        | VWR Chemicals   |
| Chloroform-d ( $99.8 \text{ atom } \% \text{ D}$ )                                                    | Sigma-Aldrich   |
| Phenylacetylene (97%)                                                                                 | Carbolution     |
| Triethylsilane (99%)                                                                                  | Carbolution     |
| 1-Chlorobutane ( $\geq 99\%$ )                                                                        | Merck           |
| 1-Methylimidazole (99%)                                                                               | Fluorochem      |
| Lithium bis(trifluoromethanesulfonyl)imide (99%)                                                      | Fluorochem      |

## S2 Characterization of the ionic liquid 1-butyl-3-methylimidazoliumbis(trifluoromethylsulfonyl)imide ([BMIm] $\text{NTf}_2$ )

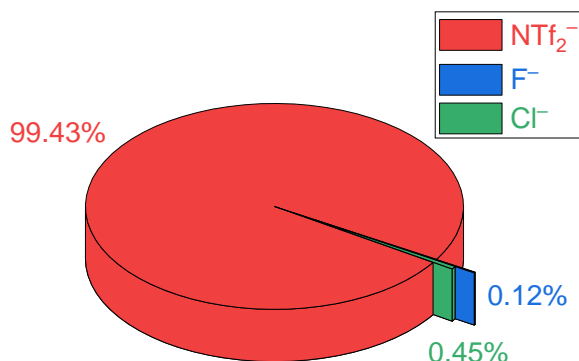

**Figure S1** Ion chromatographic measurement (IC) of the synthesized ionic liquid (IL) [BMIm] $\text{NTf}_2$ . Anion purity of  $\text{NTf}_2^-$  (red) was ascertained with the average of two measurements, resulting in a weight percentage of 99.43%.

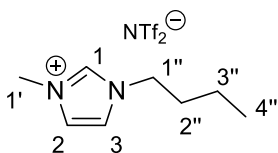

$^1\text{H}$  NMR ( $\text{CDCl}_3$ , 300.13 MHz; internal standard =  $\text{CHCl}_3$ ):  $\delta$  8.72 (s, 1H, 1-H), 7.31 (m, 2H, 2-3- $\text{H}_2$ ), 4.16 (t, 2H,  $^3J = 7.5 \text{ Hz}$ , 1''- $\text{H}_2$ ), 3.93 (s, 3H, 1'- $\text{H}_3$ ), 1.84 (tt, 2H,  $^3J = 7.5 \text{ Hz}$ ,  $^3J = 7.5 \text{ Hz}$  2''- $\text{H}_2$ ), 1.36 (qt, 2H,  $^3J = 7.3 \text{ Hz}$ ,  $^3J = 7.5 \text{ Hz}$ , 3''- $\text{H}_2$ ), 0.95 (t, 3H,  $^3J = 7.3 \text{ Hz}$ , 4''- $\text{H}_3$ ).

$^{13}\text{C}$  NMR ( $\text{CDCl}_3$ , 75.475 MHz; internal standard =  $\text{CHCl}_3$ ):  $\delta$  136.2, 123.8, 122.4, 119.9 (q,  $^1J = 321.1 \text{ Hz}$ ), 50.1, 36.4, 32.0, 19.5, 13.3.

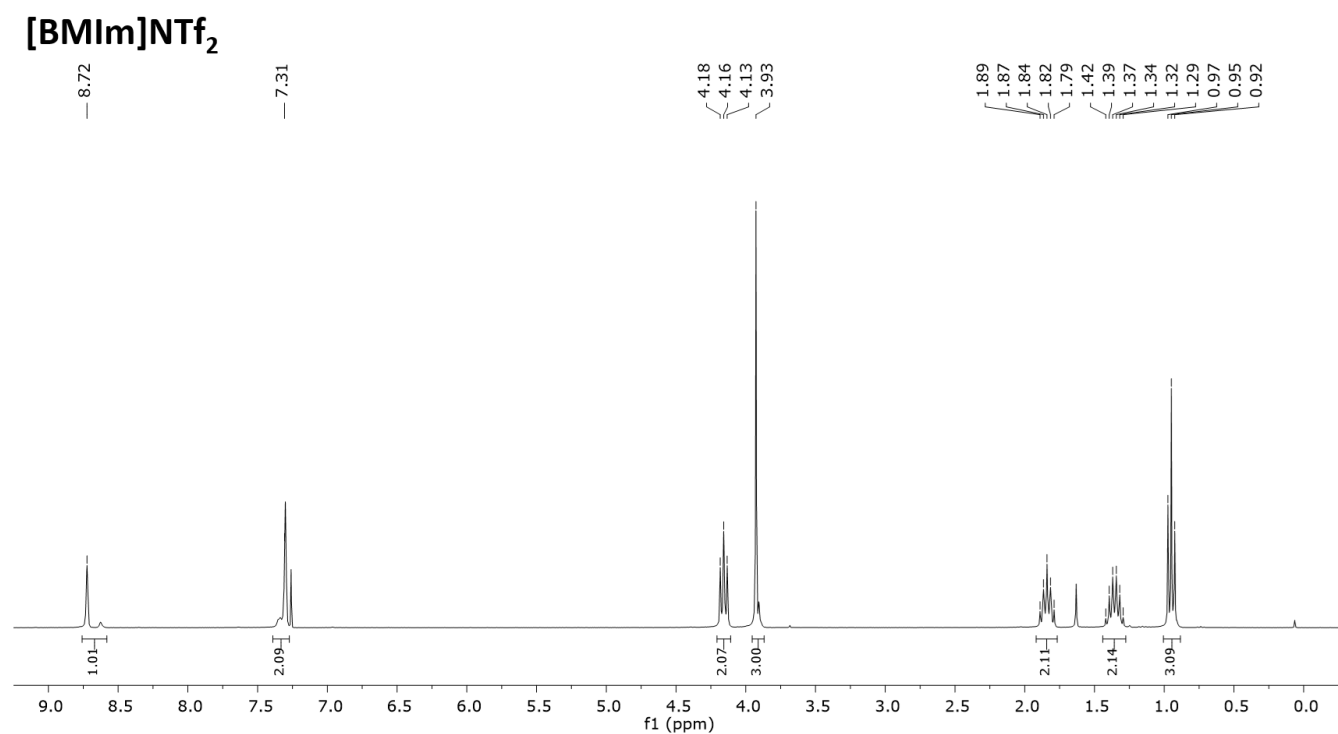

**Figure S2** <sup>1</sup>H nuclear magnetic resonance (NMR) spectrum (300.13 MHz, CDCl<sub>3</sub>) of [BMIm]NTf<sub>2</sub>.

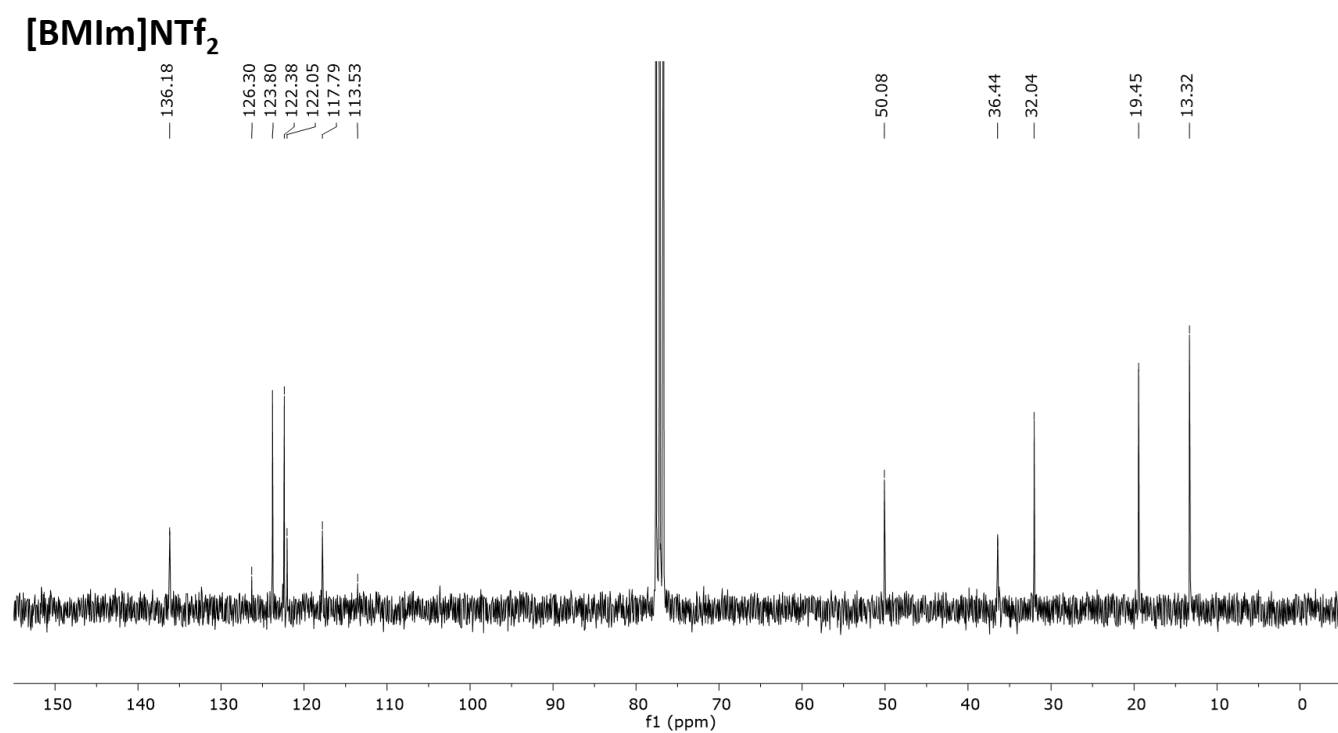

**Figure S3** <sup>13</sup>C NMR spectrum (CDCl<sub>3</sub>, 75.475 MHz) of [BMIm]NTf<sub>2</sub>.

### S3 Synthesis parameters and analyses of sugar-coated platinum nanostructures (SC-Pt-NS) in 1-butyl-3-methylimidazoliumbis(trifluoromethylsulfonyl)imide ([BMIm]NTf<sub>2</sub>)

**Table S2** Amount of reactants for sugar-coated Pt-nanostructures (SC-Pt-NS) in IL, Pt content and crystallite size of the product.

| Sample <sup>a</sup> | Amount of H <sub>2</sub> PtCl <sub>6</sub> ·6H <sub>2</sub> O | Sugar type    | Amount of sugar     | Amount of IL | theor. Pt wt.% <sup>b</sup> | Pt wt.% from AAS <sup>c</sup> | Average primary crystallite size (nm) <sup>d</sup> |
|---------------------|---------------------------------------------------------------|---------------|---------------------|--------------|-----------------------------|-------------------------------|----------------------------------------------------|
| S5                  | 20.0 mg, 0.04 mmol                                            | Sucrose       | 204.0 mg, 0.60 mmol | 0.94 g       | 3.6 %                       | 4.7 %                         | 12 ± 1                                             |
| S12                 | 20.0 mg, 0.04 mmol                                            | Sucrose       | 90.5 mg, 0.26 mmol  | 0.94 g       | 7.7 %                       | 11.6 %                        | 11 ± 1                                             |
| S13                 | 20.0 mg, 0.04 mmol                                            | Sucrose       | 67.9 mg, 0.20 mmol  | 0.94 g       | 10.0 %                      | 12.8 %                        | 9 ± 1                                              |
| S20                 | 20.0 mg, 0.04 mmol                                            | Sucrose       | 42.0 mg, 0.12 mmol  | 0.94 g       | 15.2 %                      | 20.5 %                        | 10 ± 1                                             |
| S25                 | 20.0 mg, 0.04 mmol                                            | Sucrose       | 22.6 mg, 0.07 mmol  | 0.94 g       | 25.0 %                      | 24.7 %                        | 8 ± 1                                              |
| F6                  | 20.0 mg, 0.04 mmol                                            | D(-)-Fructose | 214.0 mg, 1.18 mmol | 0.94 g       | 3.4 %                       | 5.7 %                         | 11 ± 1                                             |
| F10                 | 20.0 mg, 0.04 mmol                                            | D(-)-Fructose | 95.2 mg, 0.53 mmol  | 0.94 g       | 7.3 %                       | 10.1 %                        | 10 ± 1                                             |
| F14                 | 20.0 mg, 0.04 mmol                                            | D(-)-Fructose | 71.5 mg, 0.40 mmol  | 0.94 g       | 9.5 %                       | 13.6 %                        | 11 ± 1                                             |
| F17                 | 20.0 mg, 0.04 mmol                                            | D(-)-Fructose | 44.2 mg, 0.24 mmol  | 0.94 g       | 14.6 %                      | 16.9 %                        | 10 ± 1                                             |
| F32                 | 20.0 mg, 0.04 mmol                                            | D(-)-Fructose | 23.8 mg, 0.13 mmol  | 0.94 g       | 24.0 %                      | 31.5 %                        | 10 ± 1                                             |

<sup>a</sup> Sample number is based on the rounded found Pt wt.% from AAS. The letter "S" and "F" indicate the used carbohydrate sucrose and fructose, respectively.

<sup>b</sup> Molar mass of H<sub>2</sub>PtCl<sub>6</sub>·6H<sub>2</sub>O 517.90 g/mol with 37.67 wt.% Pt or 7.53 mg Pt from 20.0 mg of H<sub>2</sub>PtCl<sub>6</sub>·6H<sub>2</sub>O.

<sup>c</sup> Average of two measurements. The higher than theoretical value is due to partial dehydration of the carbohydrates together with some carbohydrate loss through the washing procedure.

<sup>d</sup> Average crystallite size and standard deviation are determined by applying the Scherrer equation (1) to the strongest reflexes ((111), (200), (220), (311)) observed in the respective sample:

$$L = K \times \lambda / (\Delta(2\theta) \times \cos \theta_0) \quad (1)$$

with L as average crystallite size, K as dimensionless shape factor,  $\lambda$  as wavelength,  $\Delta(2\theta)$  as full width at half maximum (FWHM) in radians and  $\theta$  as Bragg angle.

### S3.1 Elemental analysis

CHNS elemental analysis of the IL-treated samples show the presence of sulfur and nitrogen as evidence of remaining IL traces. Based on the N and S percentage the IL content was estimated. The N to the S percentage in relation to the calculated ratio was close to the expected value for the fructose samples (0.9-1.0) and slightly higher for the sucrose samples (1.24-1.29). This higher N:S ratio is due to acetonitrile traces which remain enclosed (clathrated) in the caramelized sugars during the process of drying for 1 h.

**Table S3** CHNS elemental analysis of sucrose, D(-)-fructose, their thermally treated samples ( $S_{sup}$ ,  $F_{sup}$ ) and SC-Pt-NS samples.

| Sample                     | C (%)<br>(theor) | H (%)<br>(theor) | O (%)<br>(theor.) | N (%) | S (%) | IL-content<br>(%) <sup>a</sup> |
|----------------------------|------------------|------------------|-------------------|-------|-------|--------------------------------|
| Sucrose <sup>b</sup>       | 42.20<br>(42.11) | 6.53<br>(6.48)   | -<br>(51.41)      | -     | -     | -                              |
| D(-)-fructose <sup>c</sup> | 39.88<br>(40.00) | 6.86<br>(6.71)   | -<br>(53.28)      | -     | -     | -                              |
| $S_{sup}$                  | 48.07            | 5.39             |                   | 0.57  | 0.88  | 5.8                            |
| $F_{sup}$                  | 48.37            | 5.46             |                   | 0.57  | 0.76  | 5.0                            |
| S13                        | 53.48            | 3.71             |                   | 0.90  | 1.10  | 7.2                            |
| S25                        | 45.55            | 3.47             |                   | 0.56  | 0.66  | 4.3                            |
| F14                        | 48.74            | 3.41             |                   | 0.92  | 1.55  | 10.1                           |
| F32                        | 38.60            | 2.71             |                   | 1.31  | 1.96  | 12.8                           |

<sup>a</sup> IL-content was calculated from the sulfur percentage based on the ratio of molar mass of IL (419.36 g mol<sup>-1</sup>) to expected molar mass of sulfur in IL (2 S-atoms, 64.12 g mol<sup>-1</sup>).

<sup>b</sup> C<sub>12</sub>H<sub>22</sub>O<sub>11</sub> (M = 342.30 g mol<sup>-1</sup>).

<sup>c</sup> C<sub>6</sub>H<sub>12</sub>O<sub>6</sub> (M = 180.16 g mol<sup>-1</sup>).

### S3.2 Powder X-ray diffractometry (PXRD)

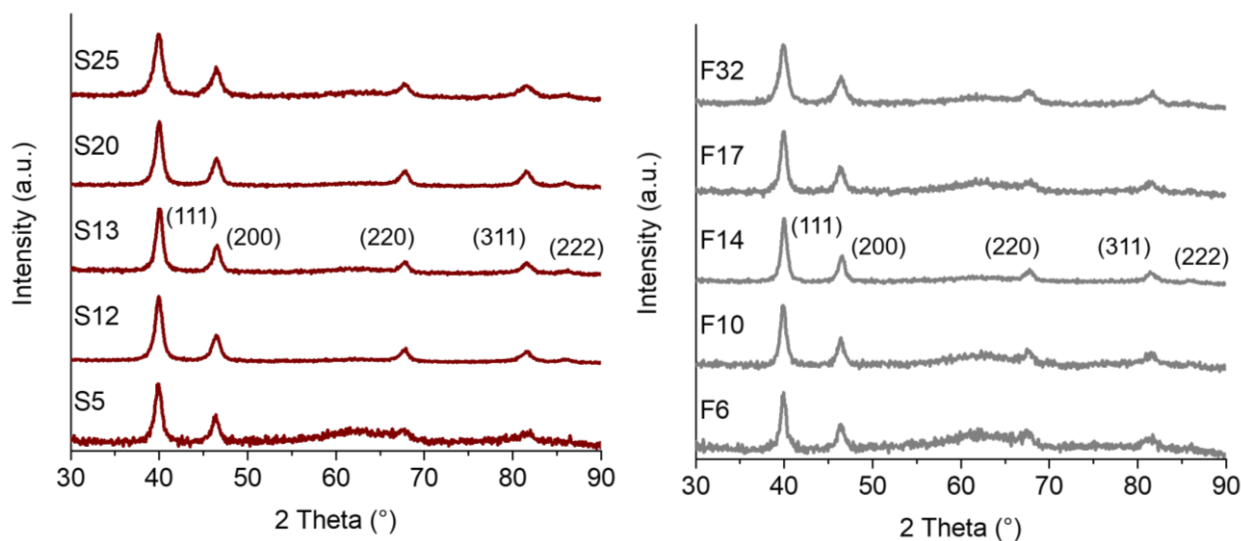

**Figure S4** PXRD patterns of SC-Pt-NS (left: with sucrose; right: with fructose). In each pattern, the Pt metal reflections (111), (200), (220), (311) and (222) are visible, cf. simulation in Figure. 1 in the main text.

### S3.3 Transmission electron microscopy (TEM)

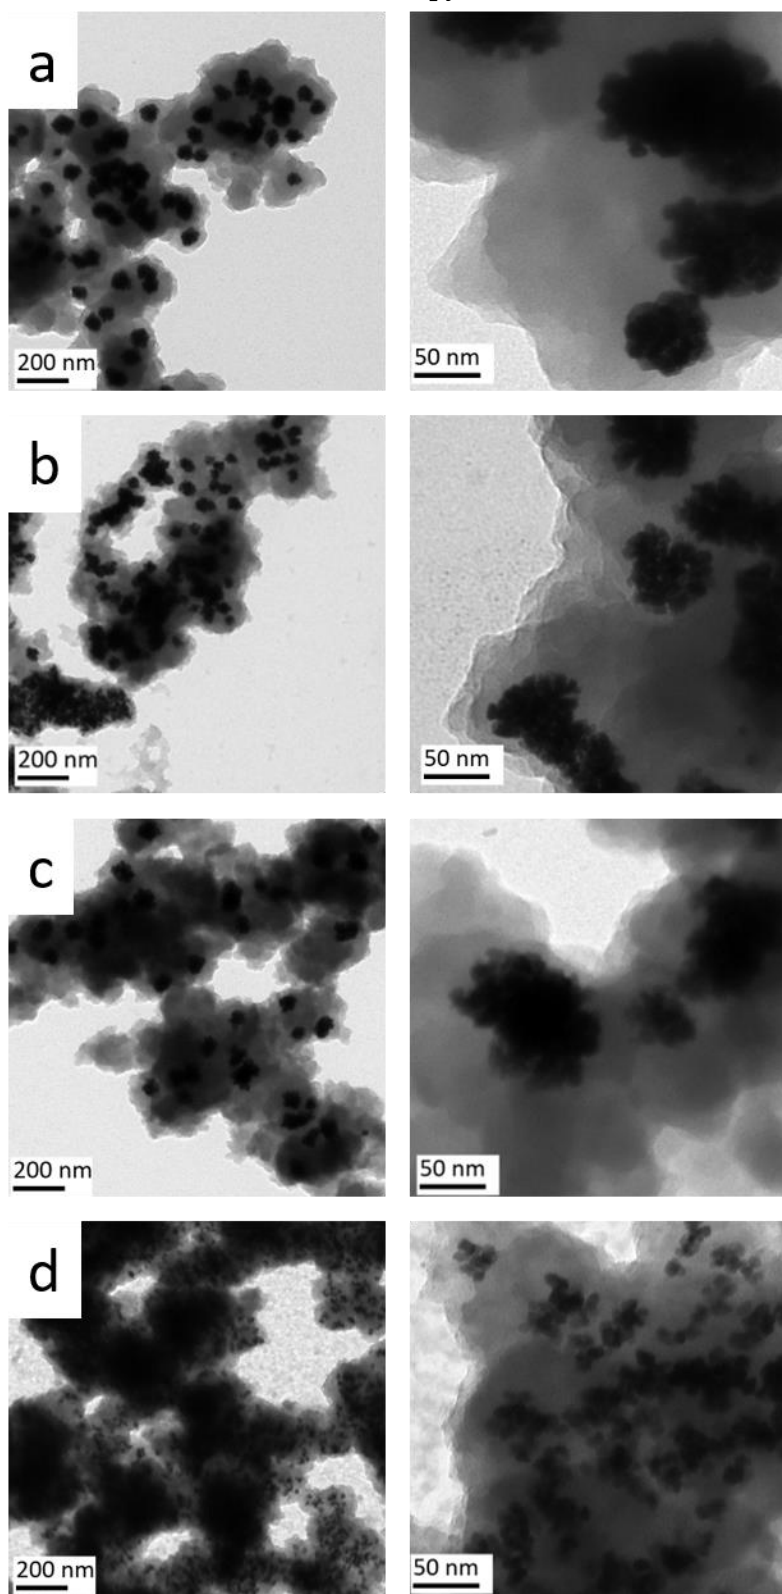

**Figure S5** TEM images for samples after 1 year of storage. (a) S13, (b) S25, (c) F14 and (d) F32.

### S3.4 Dynamic light scattering (DLS)

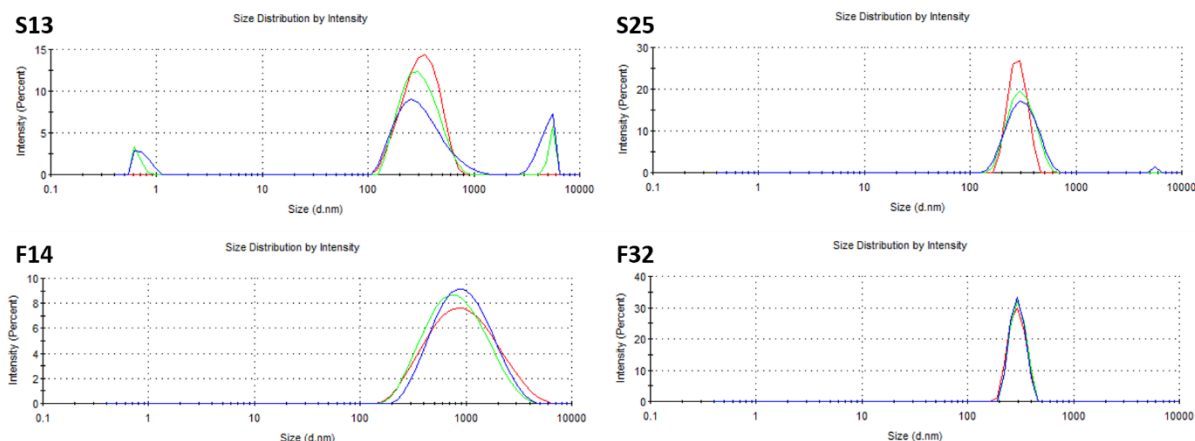

**Figure S6** Dynamic light scattering (DLS) of SC-Pt-NS S13, S25, F14 and F32 with an average size of 330 nm, 300 nm, 1060 nm and 300 nm, respectively. Three measurements with automatically decided number of runs were done for each sample and are shown in different colors.

### S4 Fourier-transform infrared (FTIR) spectroscopy measurements

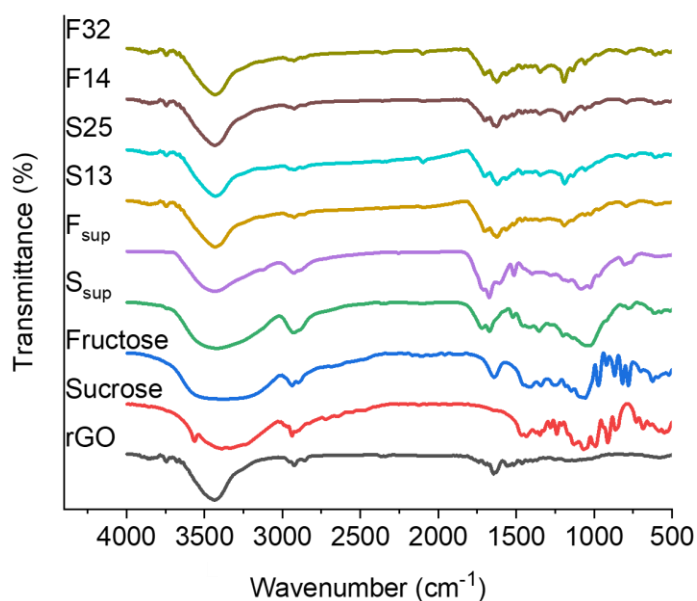

**Figure S7** FTIR spectra of the samples S13, S25, F14 and F32 as KBr pellets. In addition, reference samples of sucrose, D(-)-fructose, their respectively thermally treated samples (S<sub>sup</sub>, F<sub>sup</sub>) and reduced graphene oxide (rGO) are shown. The O-H peak at  $\sim 3400 \text{ cm}^{-1}$  is due to the uptake of water by KBr during the sample preparation and overlaps with sample signals.

The obtained FTIR spectra of the reference samples fit to Max and Chapados [70]. From the analysis of the data, it is possible that during the synthesis the sugar partially decomposed, possibly under condensation, by observing the absence and reduction of the C-H and C-OH frequencies, respectively, and the presence of the H<sub>2</sub>O small stretching frequency at  $\sim 2100 \text{ cm}^{-1}$ . The coating retains functional groups, e.g. at  $\sim 1050 \text{ cm}^{-1}$  and  $\sim 1350 \text{ cm}^{-1}$ .

**Table S4** FTIR frequencies identified for the SC-Pt-NS, which differ to the pure carbohydrates [70].

| cm <sup>-1</sup> | Type of vibration                  |
|------------------|------------------------------------|
| ~1050            | C-O-C Stretching, C-O-H Stretching |
| ~1140            | C-O-C Stretching, C-O-C Bending    |
| ~1190            | C-O-C Bending,                     |
| ~1350            | C-O-H Bending, H-C-H Bending       |
| ~1620            | C=C Stretching                     |
| ~1700            | C=C Stretching                     |
| ~2100            | H <sub>2</sub> O Stretching        |

## S5 MALDI-TOF mass spectrometry

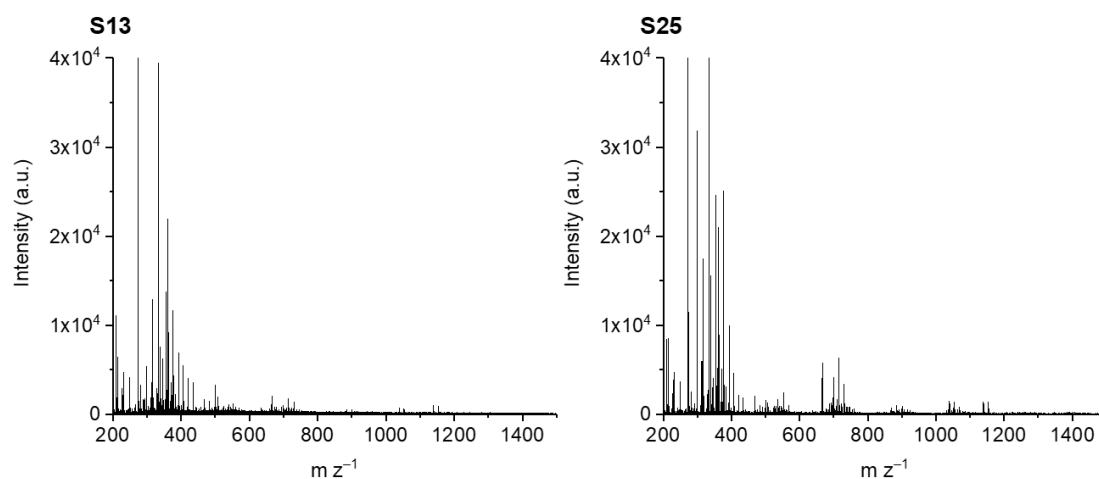

**Figure S8** MALDI-TOF mass spectra of the SC-Pt-NS S13 and S25 from the matrix DHB.

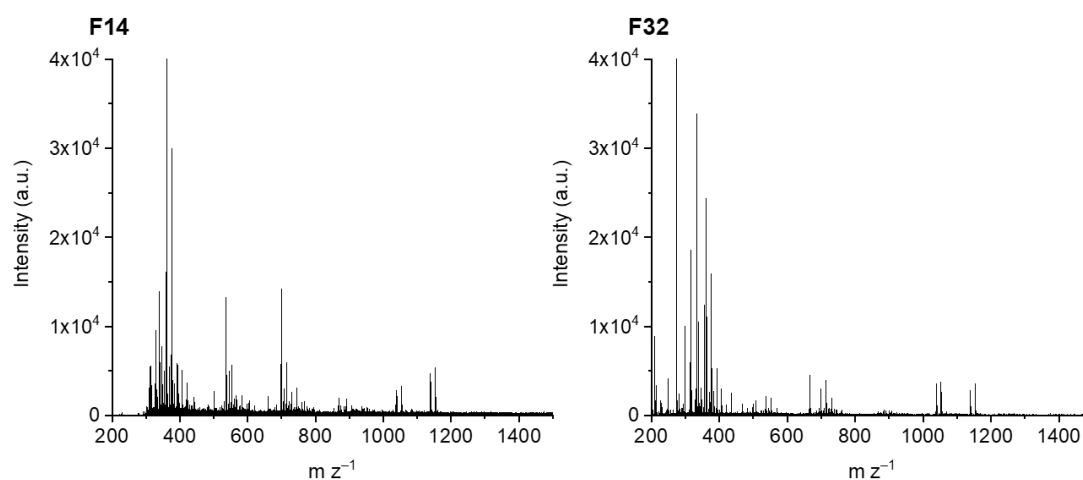

**Figure S9** MALDI-TOF mass spectra of the SC-Pt-NS F14 and F32 from the matrix DHB.

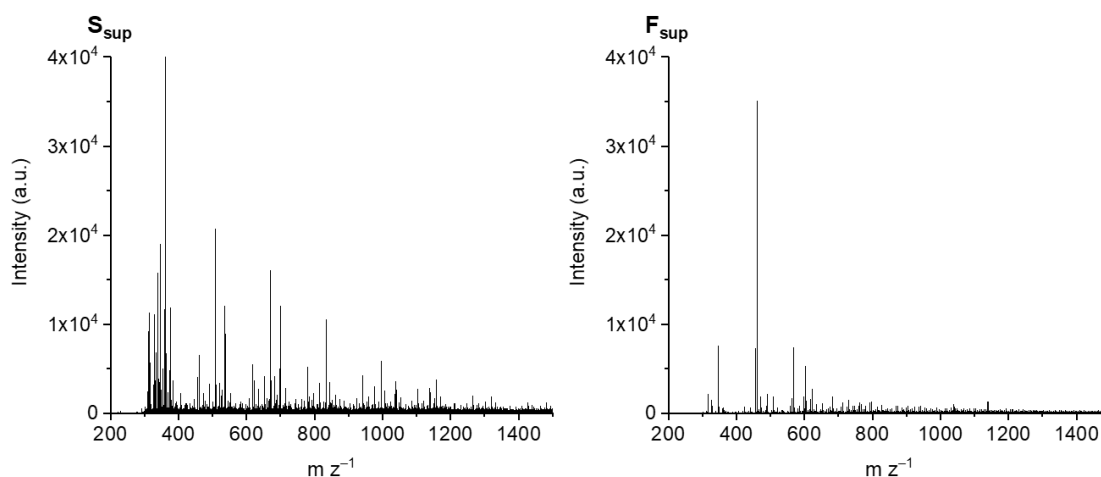

**Figure S10** MALDI-TOF mass spectra of the saccharides  $S_{\text{sup}}$  and  $F_{\text{sup}}$  from the matrix DHB.

## S6 Effect of water in the synthesis of platinum nanoparticles in IL

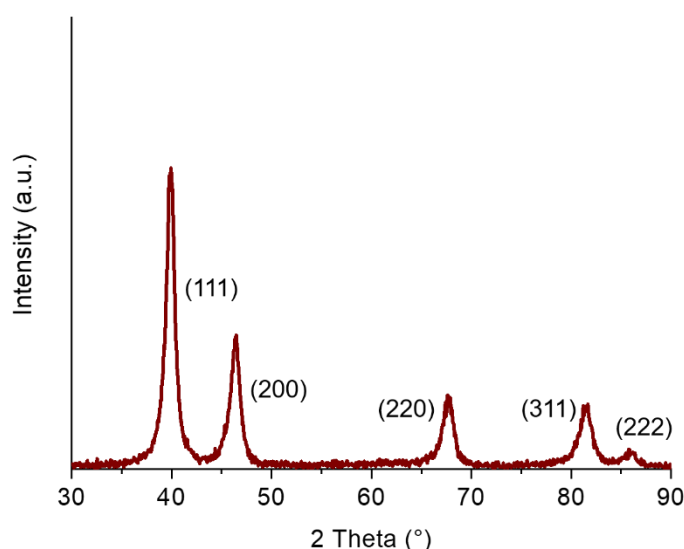

**Figure S11** PXRD pattern of Pt-NPs synthesized in [BMIm]NTf<sub>2</sub> and water (5 wt.%). The reflections (111), (200), (220), (311) and (222) match the pattern for fcc-Pt metal (cf. Fig. 1 in the main text). By applying the Scherrer equation to the PXRD data, an average crystal size of ~8 nm was estimated.

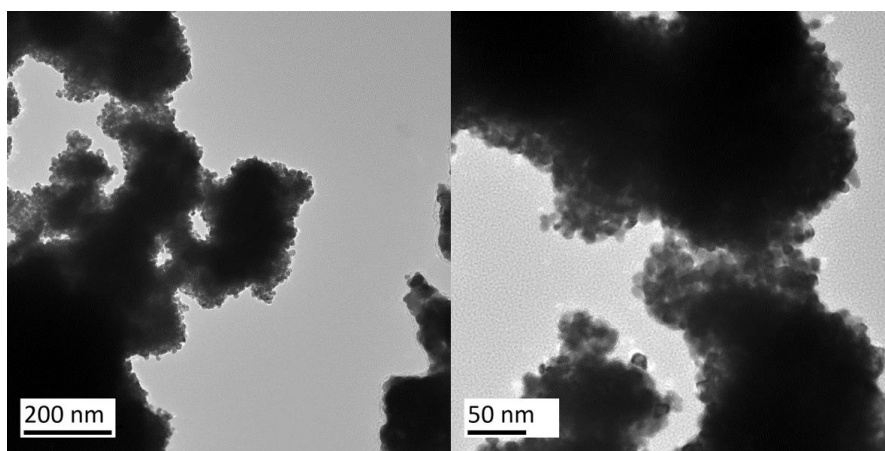

**Figure S12** TEM images of Pt-NPs synthesized in [BMIm]NTf<sub>2</sub> and water (5 wt.%).

From the analysis we conclude that the water-content alone cannot be responsible to obtain the aggregated features observed in the SC-Pt-NS. Hence, the water formed upon partial decomposition (condensation) of the sugar molecules only plays a minor role in the formation of the sugar-coated nanostructures.

### S7 Carbohydrate-free platinum nanoparticles synthesized in 1-butyl-3-methylimidazolium-bis(trifluoromethylsulfonyl)imide ([BMIm]NTf<sub>2</sub>)

For comparison purposes, unsupported Pt-NPs were synthesized following the identical experimental steps but without the presence of a carbohydrate:

The Pt precursor H<sub>2</sub>PtCl<sub>6</sub>·6H<sub>2</sub>O (20.0 mg, 0.04 mmol) was added to 0.94 g (0.65 mL) of the IL [BMIm]NTf<sub>2</sub>. The mixture was stirred for 2 h at 400 rpm, followed by microwave heating for 10 min at 200 °C under 20 W microwave power. By addition of 3 mL of acetonitrile and centrifugation at 4000 rpm for 10 min a solid product was separated from the brown solution. The washing process using acetonitrile was repeated several times until after six washing cycles with a total of 18 mL of acetonitrile, a colorless solution was obtained. Finally, the solid product was dried at room temperature in an oil pump vacuum.

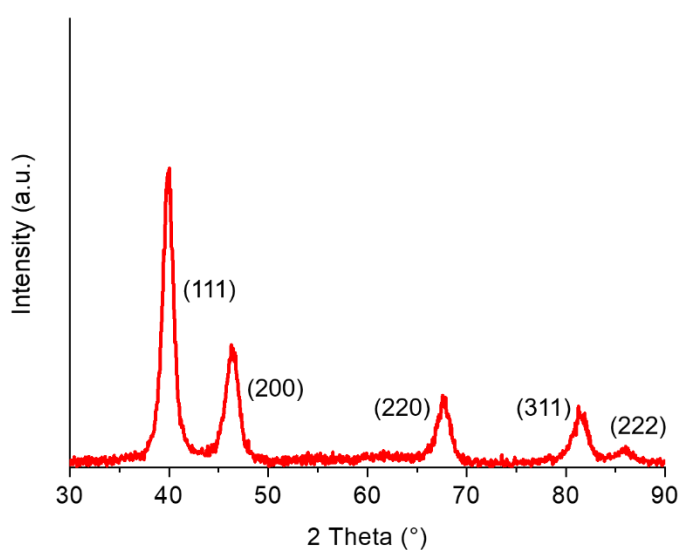

**Figure S13** PXRD patterns of Pt-NPs synthesized in the IL [BMIm]NTf<sub>2</sub>. The reflections (111), (200), (220), (311) and (222) match the pattern for fcc-Pt metal (cf. Fig. 1 in the main text).

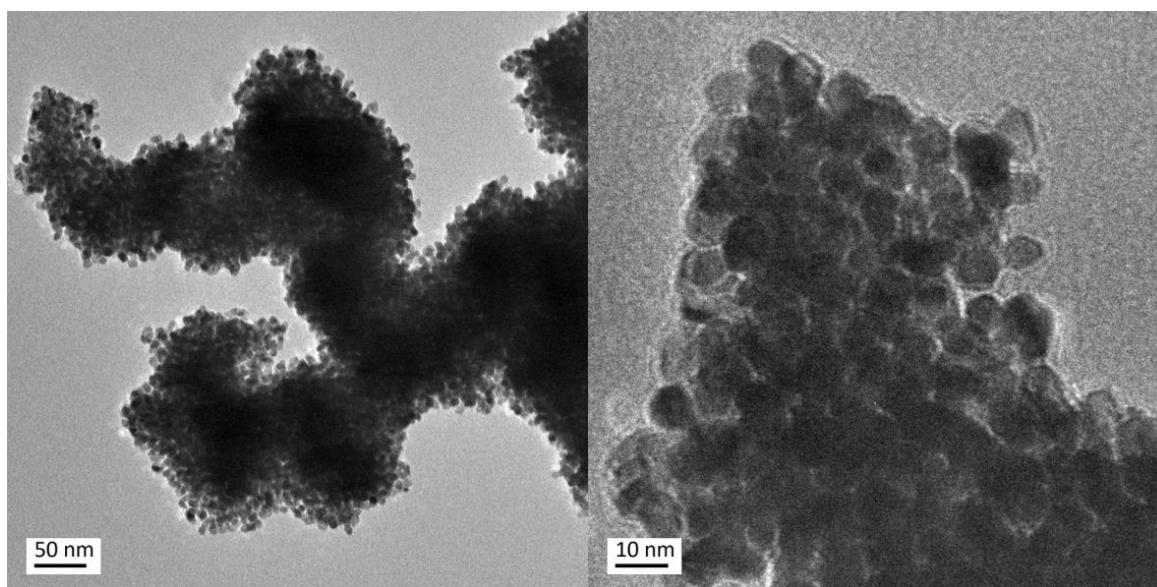

**Figure S14** TEM images of agglomerated Pt-NPs synthesized in IL without the presence of sugars.

## S8 Analysis of thermally treated sugars in IL

The sugars sucrose and D(-)-fructose were thermally treated in IL (in the absence of the Pt precursor) to analyze the changes incurred to the carbohydrates. The thermally treated sucrose and D(-)-fructose samples are labelled  $S_{\text{sup}}$  and  $F_{\text{sup}}$ , respectively.

The CHNS elemental analysis of  $S_{\text{sup}}$  and  $F_{\text{sup}}$  is given in Table S3.

The FTIR spectra of  $S_{\text{sup}}$  and  $F_{\text{sup}}$  are given in Figure S7.

### S8.1 Powder X-ray diffractometry (PXRD)

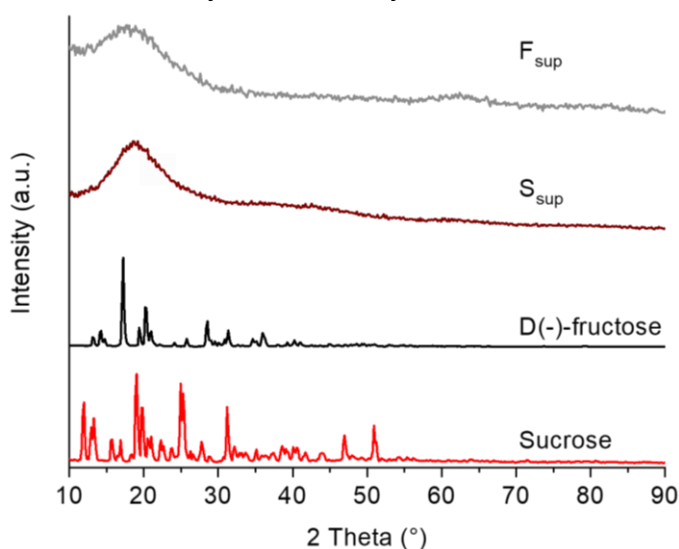

**Figure S15** PXRD patterns of thermally treated sucrose and D(-)-fructose in the IL [BMIm]NTf<sub>2</sub> at the same conditions as in the synthesis of SC-Pt-NS (200 °C for 10 min microwave induced heating).

### S8.2 Thermogravimetry analysis (TGA)

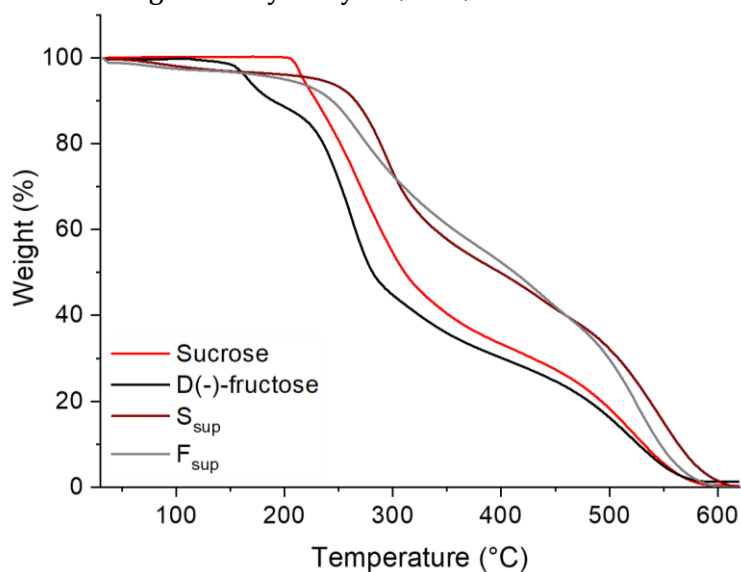

**Figure S16** Thermogravimetric analysis (TGA) of neat sucrose and D(-)-fructose and of thermally treated sucrose and D(-)-fructose in the IL [BMIm]NTf<sub>2</sub> (200 °C for 10 min microwave induced heating). TGA at a heating rate of 5 °C min<sup>-1</sup> under synthetic air.

### Sucrose

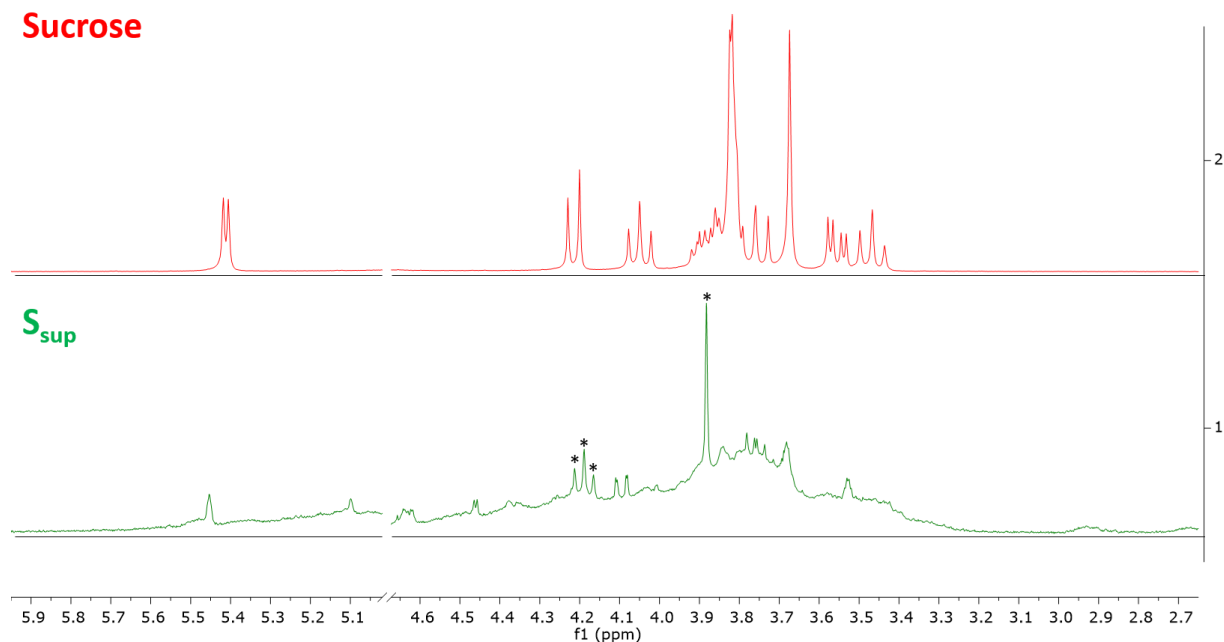

**Figure S17**  $^1\text{H}$  NMR spectra ( $\text{D}_2\text{O}$ , 300.13 MHz) of sucrose before (top) and after (bottom) thermal treatment in IL ( $S_{\text{sup}}$ , 200 °C for 10 min microwave induced heating). The region with the deuterated solvent ( $\text{D}_2\text{O}$ ) signal at 4.79 ppm has been left out for clarity. In the spectrum of  $S_{\text{sup}}$ , a significant broadening of the baseline can be observed in the range from 3.1 to 5.5 ppm, possibly due to an inhomogeneous degradation of the carbohydrate. Furthermore, in the  $S_{\text{sup}}$  spectrum residual IL peaks are visible (signals marked with \*).

### D(-)-fructose

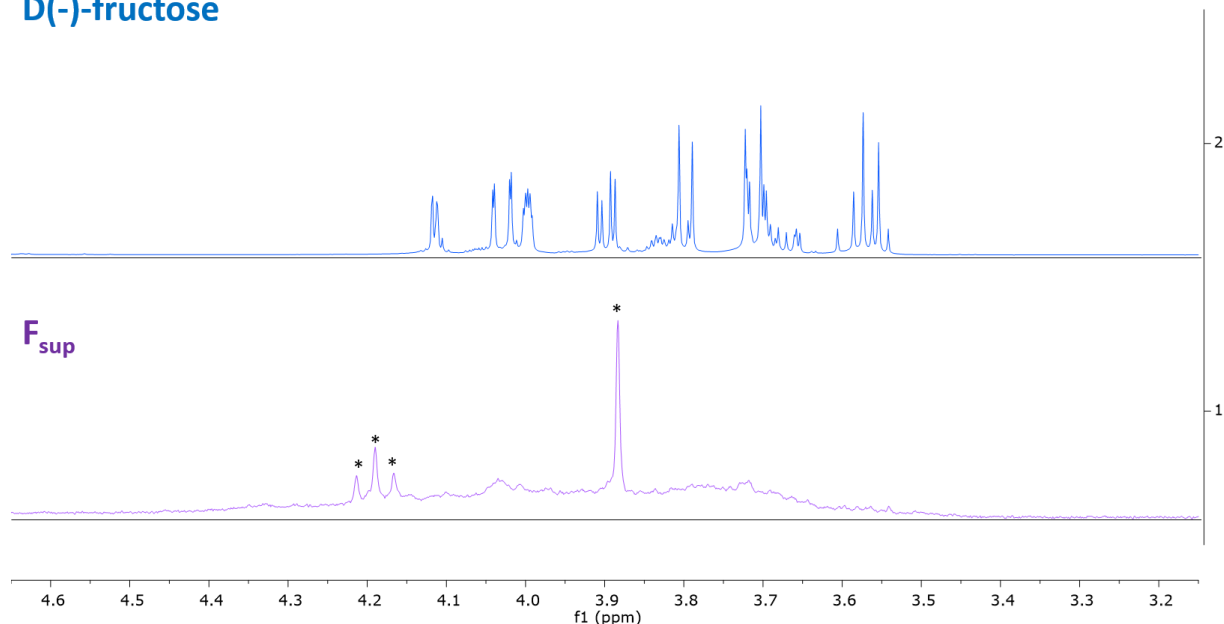

**Figure S18**  $^1\text{H}$  NMR spectra ( $\text{D}_2\text{O}$ , 300.13 MHz) of D(-)-fructose before (top) and after (bottom) thermal treatment in IL ( $F_{\text{sup}}$ , 200 °C for 10 min microwave induced heating). In the spectrum of  $F_{\text{sup}}$ , a significant broadening can be observed in the range from 3.4 to 4.3 ppm, possibly due to an inhomogeneous degradation of the carbohydrate. Furthermore, in the  $F_{\text{sup}}$  spectrum residual IL signals are visible (signals marked with \*).

## S8.4 Gel permeation chromatography / size exclusion chromatography

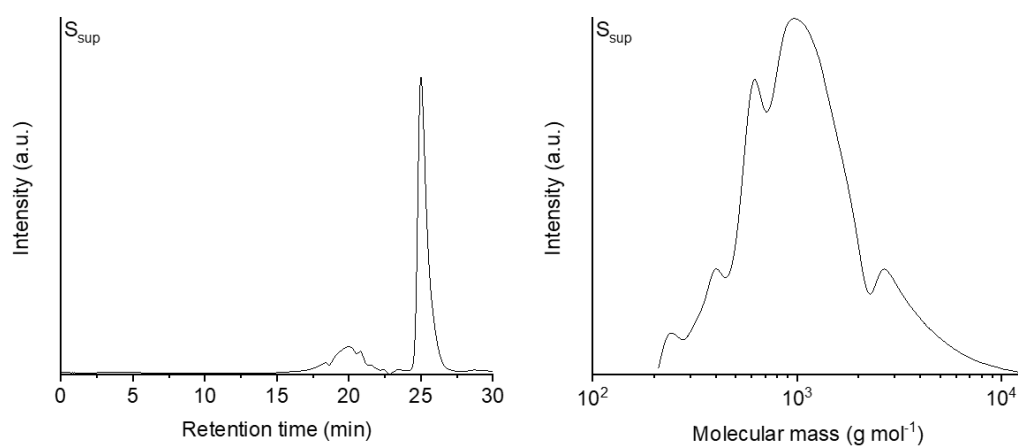

**Figure S19** GPC/SEC measurements of thermally treated sucrose. The GPC chromatograms are shown on the left and the molecular mass distribution on the right side (retention time between 15 to 23 min). The sharp signal with a retention time of ~26 min is the internal standard.

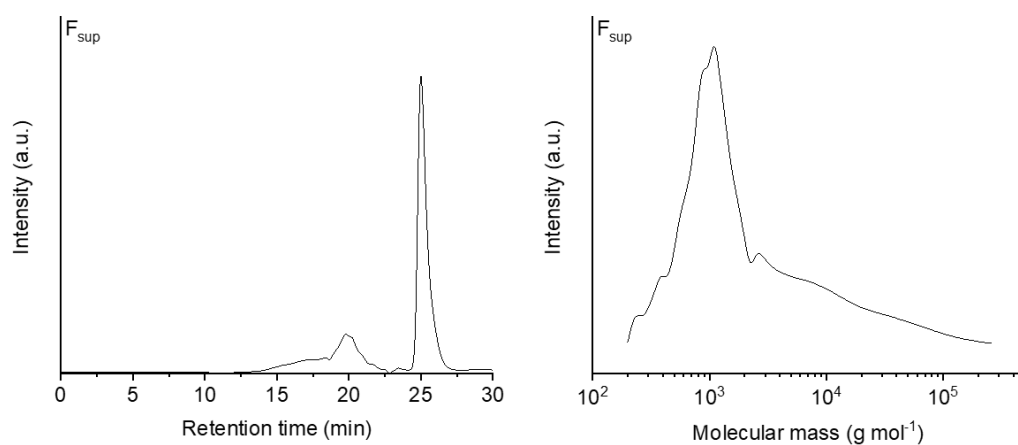

**Figure S20** GPC/SEC measurements of thermally treated D-(-)-fructose. The GPC chromatograms are shown on the left and the molecular mass distribution on the right side (retention time between 12 to 23 min). The sharp signal with a retention time of ~26 min is the internal standard.

## S9 Hydrosilylation activity and product analysis

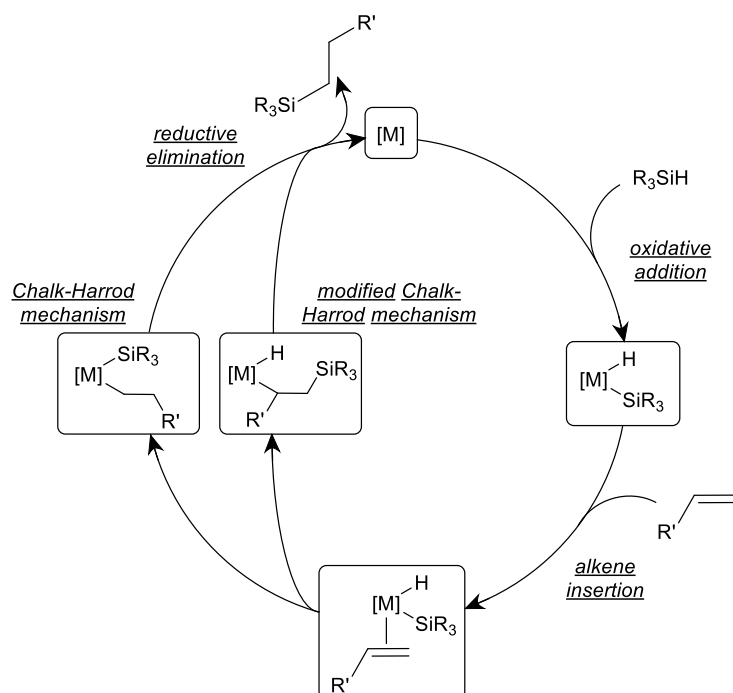

**Figure S21** Chalk-Harrod Mechanism and a modified Chalk-Harrod mechanism for the transition metal catalysed hydrosilylation of alkenes [42,49].

**Table S5** Activity of SC-Pt-NS samples in the hydrosilylation of phenylacetylene with triethylsilane.

| Sample                                              | mol Pt in SC-Pt-NS <sup>a</sup><br>( $\mu$ mol) | Molar ratio<br>substrate/Pt | Conversion<br>(%) | Molar ratio<br>distal/proximal<br>from NMR <sup>b</sup> | Molar ratio<br>distal/proximal<br>from GC <sup>c</sup> |
|-----------------------------------------------------|-------------------------------------------------|-----------------------------|-------------------|---------------------------------------------------------|--------------------------------------------------------|
| H <sub>2</sub> PtCl <sub>6</sub> ·6H <sub>2</sub> O | 2.26                                            | 2200                        | 98                | 1.9                                                     | 1.3                                                    |
| Pt-NP                                               | 4.60                                            | 1100                        | 91                | 1.9                                                     | 1.6                                                    |
| S5                                                  | 0.14                                            | 35500                       | 23                | 3.1                                                     | 3.2                                                    |
| S12                                                 | 0.31                                            | 15700                       | 85                | 1.6                                                     | 1.7                                                    |
| S13                                                 | 0.66                                            | 7500                        | 97                | 2.1                                                     | 2.1                                                    |
| S20                                                 | 0.60                                            | 8100                        | 76                | 2.0                                                     | 2.0                                                    |
| S25                                                 | 1.28                                            | 3800                        | 99                | 1.4                                                     | 1.3                                                    |
| F6                                                  | 0.15                                            | 32000                       | 10                | 3.3                                                     | 4.0                                                    |
| F10                                                 | 0.29                                            | 17100                       | 32                | 3.0                                                     | 3.4                                                    |
| F14                                                 | 0.72                                            | 6900                        | 98                | 1.7                                                     | 1.6                                                    |
| F17                                                 | 0.46                                            | 10600                       | 78                | 2.4                                                     | 2.4                                                    |
| F32                                                 | 0.86                                            | 3500                        | 99                | 1.4                                                     | 1.3                                                    |

<sup>a</sup> General conditions: 4.9 mmol phenylacetylene and triethylsilane, time 5 min, microwave induced heating at 200 W, temperature 200 °C. For the samples presented in the main document (S13, S25, F14, F32 and the references H<sub>2</sub>PtCl<sub>6</sub>·6H<sub>2</sub>O and Pt-NP) 1 mg were used, while for the other samples 0.5 mg of SC-Pt-NS were utilized. Molar values were calculated with the weigh-ins and the AAS analysis of SC-Pt-NS. Pt-content of H<sub>2</sub>PtCl<sub>6</sub>·6H<sub>2</sub>O and Pt-NP were calculated in correlation to the molar weight and assuming pure Pt-NP, respectively.

<sup>b</sup> Determined by <sup>1</sup>H-NMR spectra from the solution after the reaction. Reference signals for the distal and proximal product were taken from the literature [71].

<sup>c</sup> Determined from peak areas.

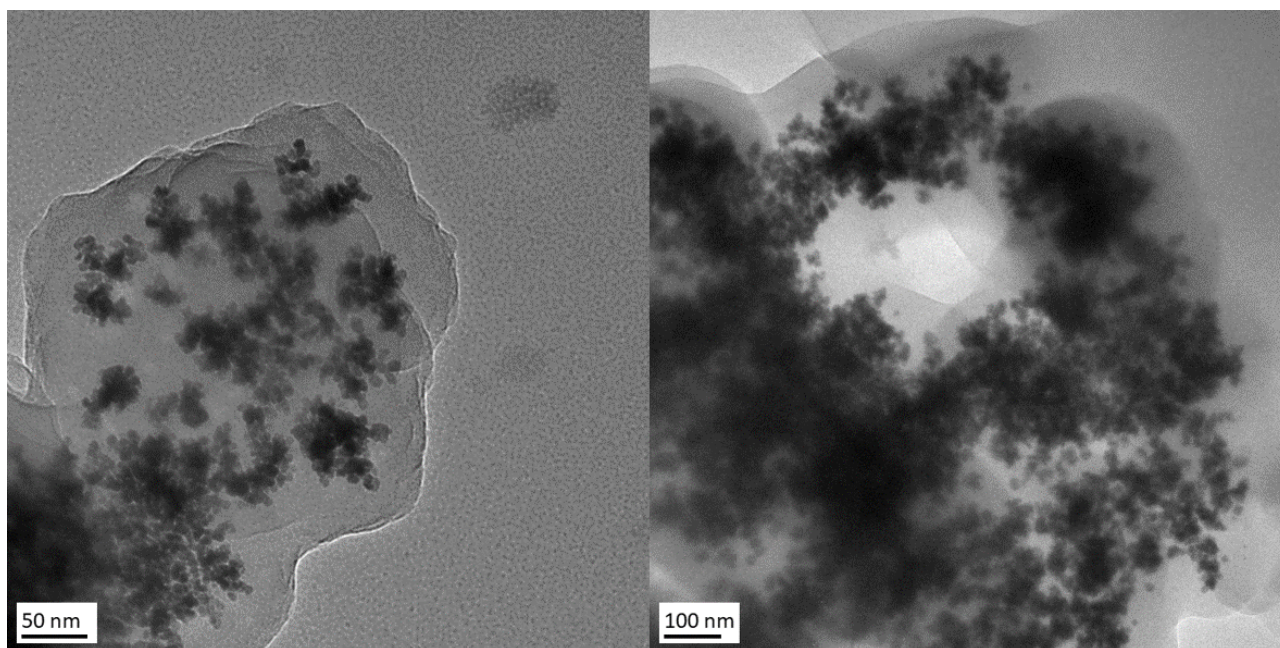

**Figure S22** TEM-images of sample S25 after it was used for three consecutive hydrosilylation runs.

### NMR analysis

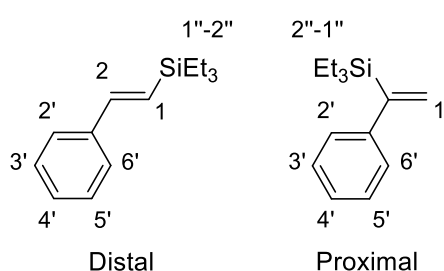

#### *Distal:*

$^1\text{H}$  NMR ( $\text{CDCl}_3$ , 300.13 MHz; internal standard = TMS):  $\delta$  7.00 - 7.40 (m, 5H, 2'-6'-H<sub>5</sub>), 6.81 (d, 1H,  $^3J$  = 19.3 Hz, 2-H), 6.33 (d, 1H,  $^3J$  = 19.3 Hz, 1-H), 0.75 - 1.00 (m, 9H, 3-2''-H<sub>3</sub>), 0.50 - 0.65 (m, 6H, 3-1''-H<sub>2</sub>).

$^{13}\text{C}$  NMR ( $\text{CDCl}_3$ , 75.475 MHz; internal standard =  $\text{CHCl}_3$ ):  $\delta$  145.0, 138.7, 128.6, 128.0, 126.5, 126.1, 7.6, 3.7.

#### *Proximal:*

$^1\text{H}$  NMR ( $\text{CDCl}_3$ , 300.13 MHz; internal standard = TMS):  $\delta$  7.00 - 7.40 (m, 5H, 2'-6'-H<sub>5</sub>), 5.77 (d, 1H,  $^3J$  = 3.1 Hz, 1-H)\*, 5.48 (d, 1H,  $^3J$  = 3.1 Hz, 1-H)\*, 0.75 - 1.00 (m, 9H, 3-2''-H<sub>3</sub>), 0.50 - 0.65 (m, 6H, 3-1''-H<sub>2</sub>); \*signal assignment interchangeable [63].

$^{13}\text{C}$  NMR ( $\text{CDCl}_3$ , 75.475 MHz; internal standard =  $\text{CHCl}_3$ ):  $\delta$  150.6, 145.7, 128.9, 128.2, 126.8, 126.2, 7.4, 3.5.

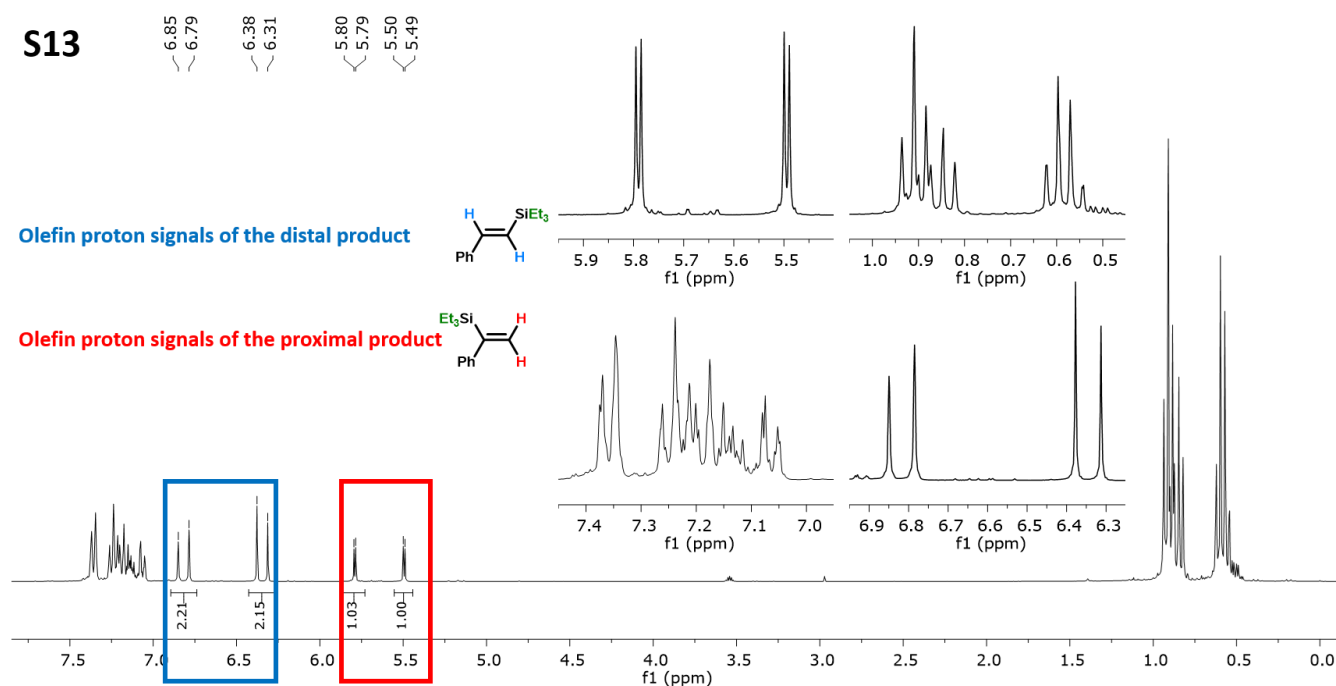

**Figure S23**  $^1\text{H}$  NMR spectrum (300.13 MHz,  $\text{CDCl}_3$ ) with expanded sections of the hydrosilylation product from sample S13. The conversion was 98% and the molar distal/proximal ratio 2.1.

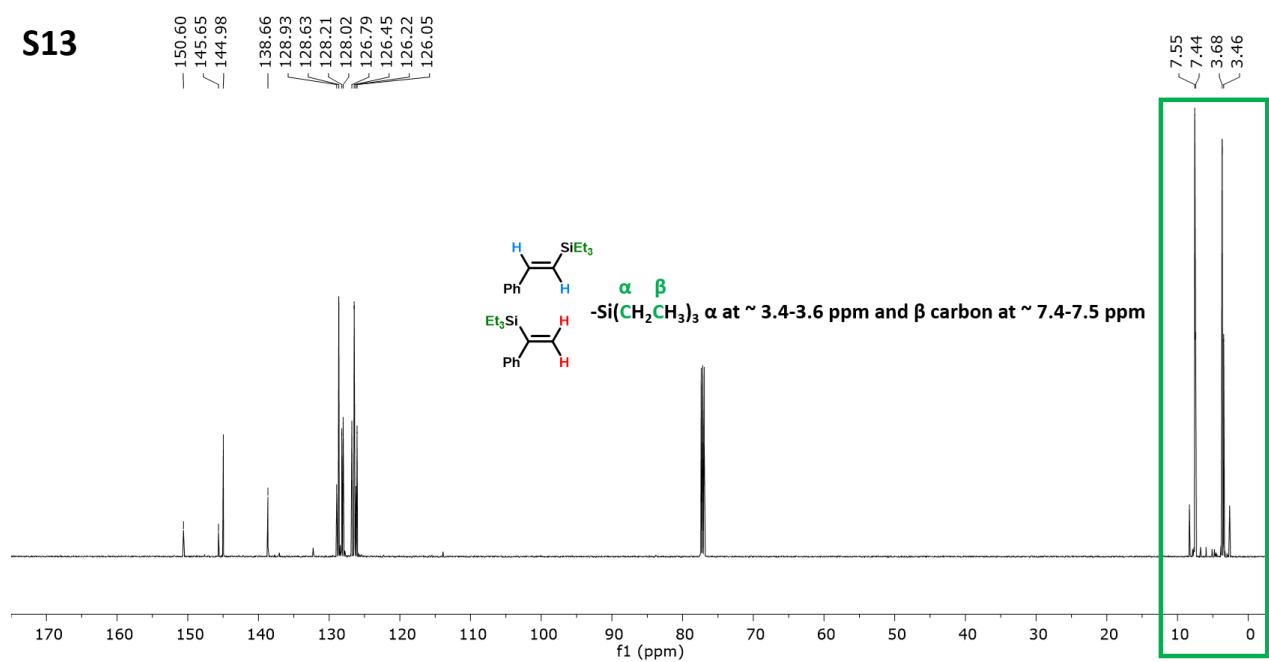

**Figure S24**  $^{13}\text{C}$  NMR spectrum (75.475 MHz,  $\text{CDCl}_3$ ) of the hydrosilylation product from sample S13. Carbon  $\alpha$  at  $\sim 3.4$ - $3.6$  ppm and carbon  $\beta$  at  $\sim 7.4$ - $7.5$  ppm. The two peaks each for  $\alpha$  and  $\beta$  are due to the distal and proximal products.

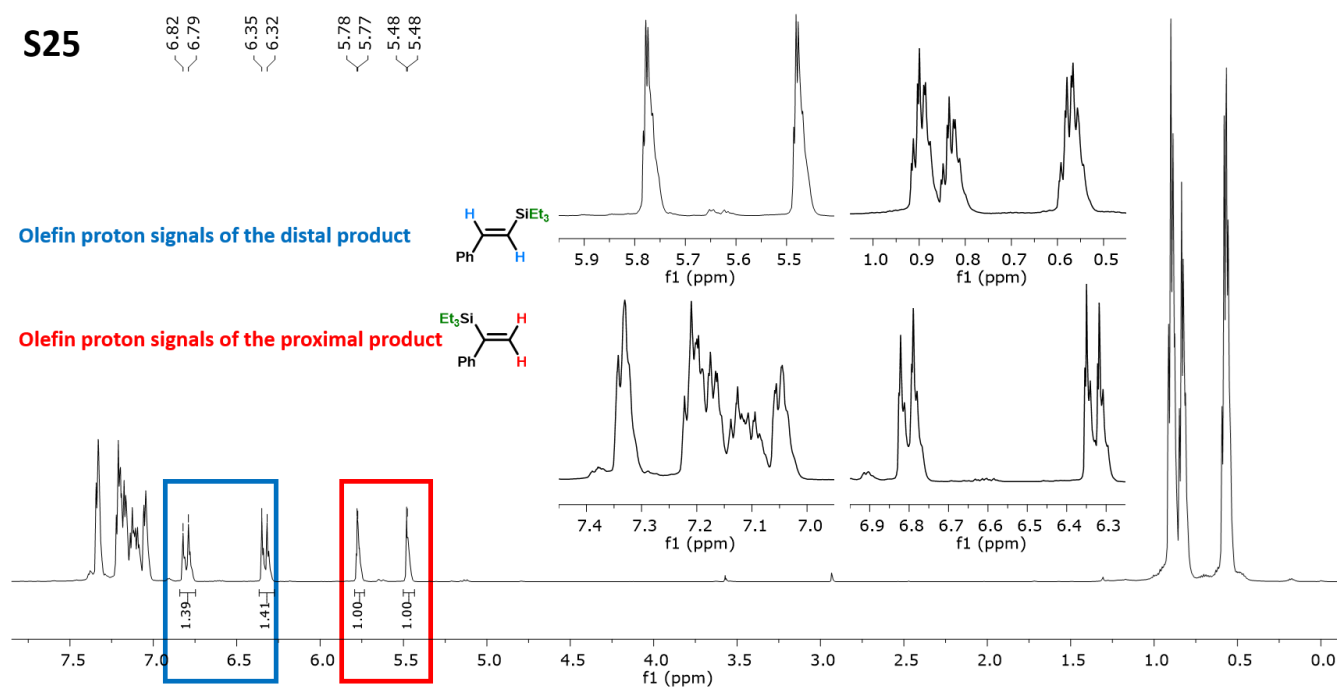

**Figure S25**  $^1\text{H}$  NMR spectrum (300.13 MHz,  $\text{CDCl}_3$ ) with expanded sections of the hydrosilylation product from sample S25. The conversion was 99% and the molar distal/proximal ratio 1.4.

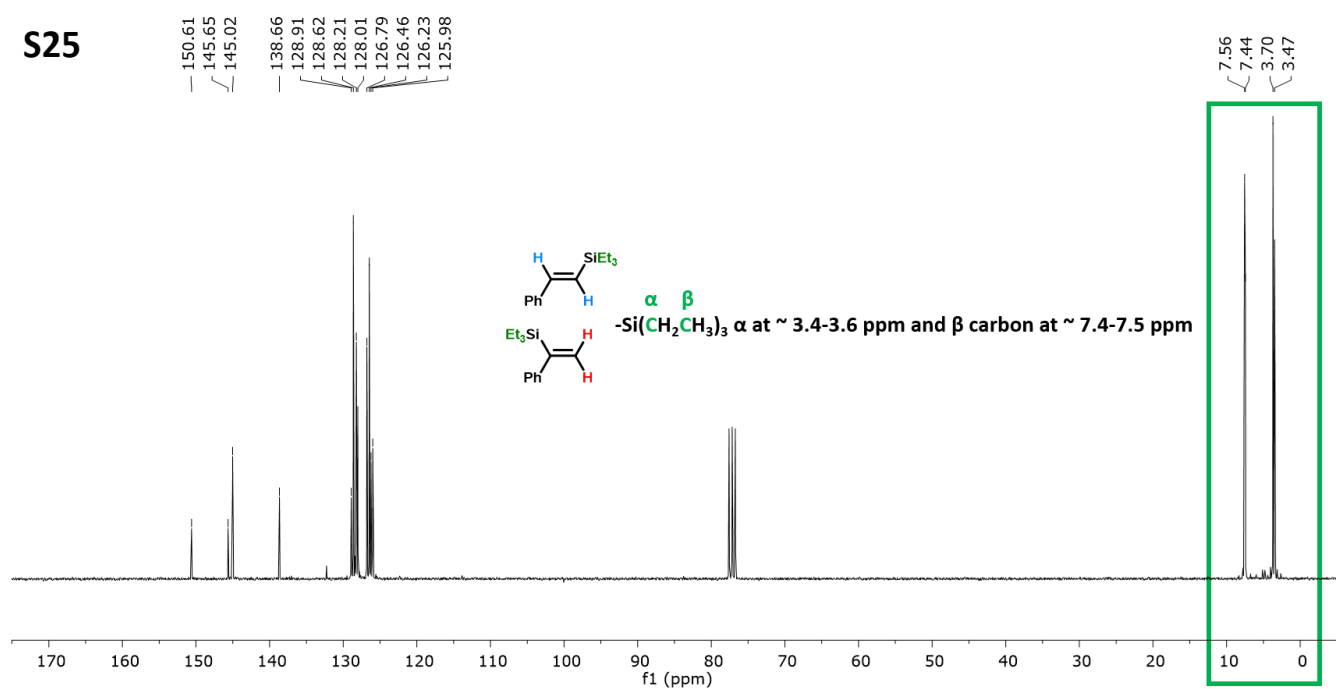

**Figure S26**  $^{13}\text{C}$  NMR spectrum (75.475 MHz,  $\text{CDCl}_3$ ) of the hydrosilylation product from sample S25. Carbon  $\alpha$  at ~3.4-3.6 ppm and carbon  $\beta$  at ~7.4-7.5 ppm. The two peaks each for  $\alpha$  and  $\beta$  are due to the distal and proximal products.

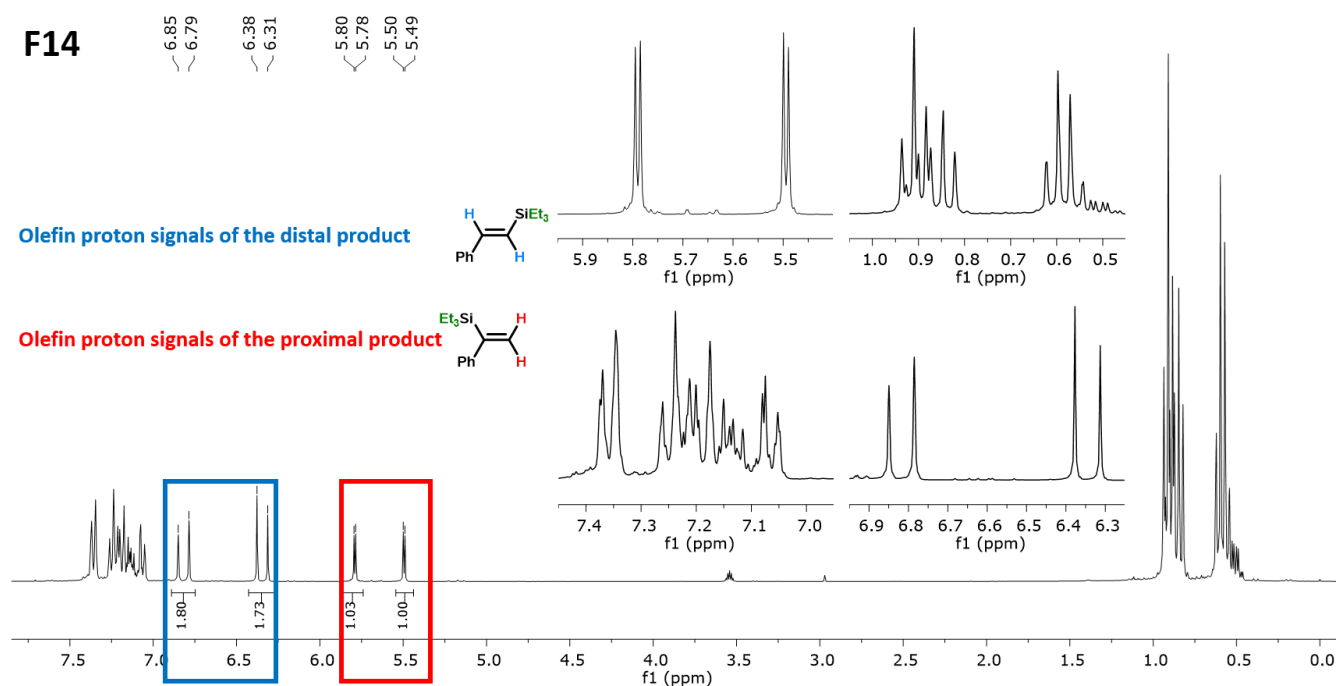

**Figure S27**  $^1\text{H}$  NMR spectrum (300.13 MHz,  $\text{CDCl}_3$ ) with expanded sections of the hydrosilylation product from sample F14. The conversion was 98% and the molar distal/proximal ratio 1.7.

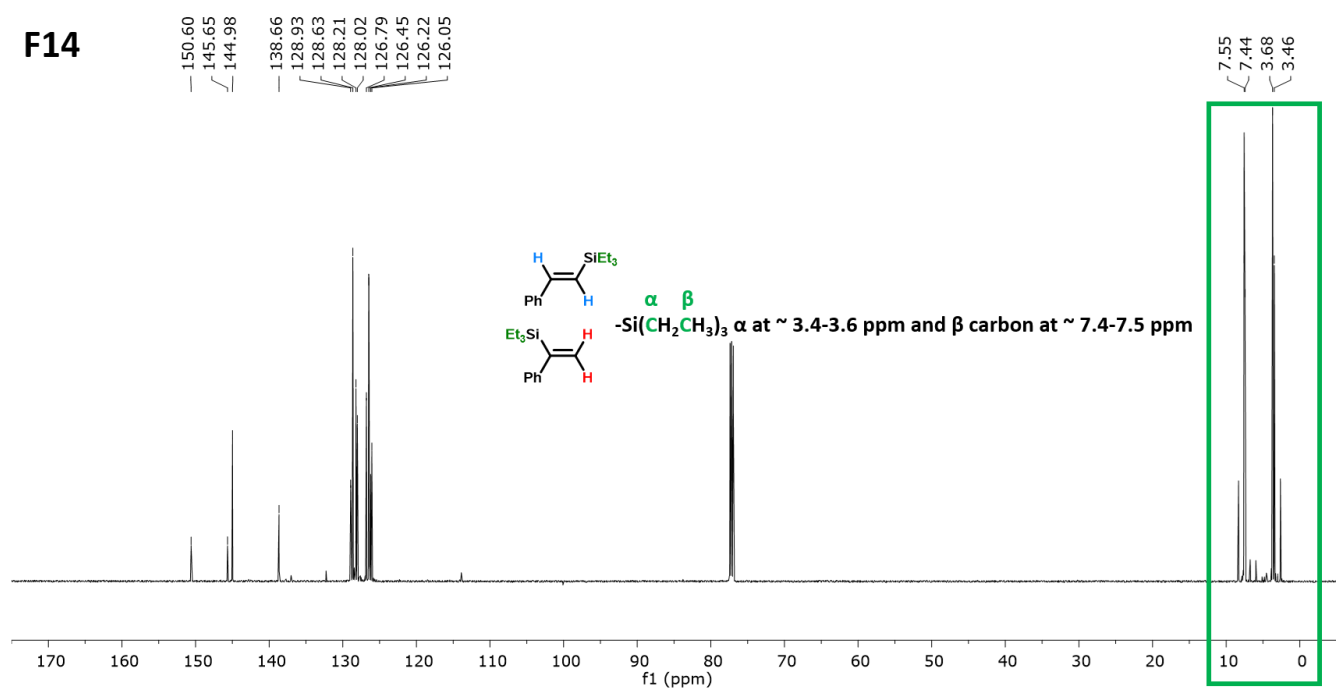

**Figure S28**  $^{13}\text{C}$  NMR spectrum (75.475 MHz,  $\text{CDCl}_3$ ) of the hydrosilylation product from sample F14. Carbon  $\alpha$  at ~3.4-3.6 ppm and carbon  $\beta$  at ~7.4-7.5 ppm. The two peaks each for  $\alpha$  and  $\beta$  are due to the distal and proximal products.

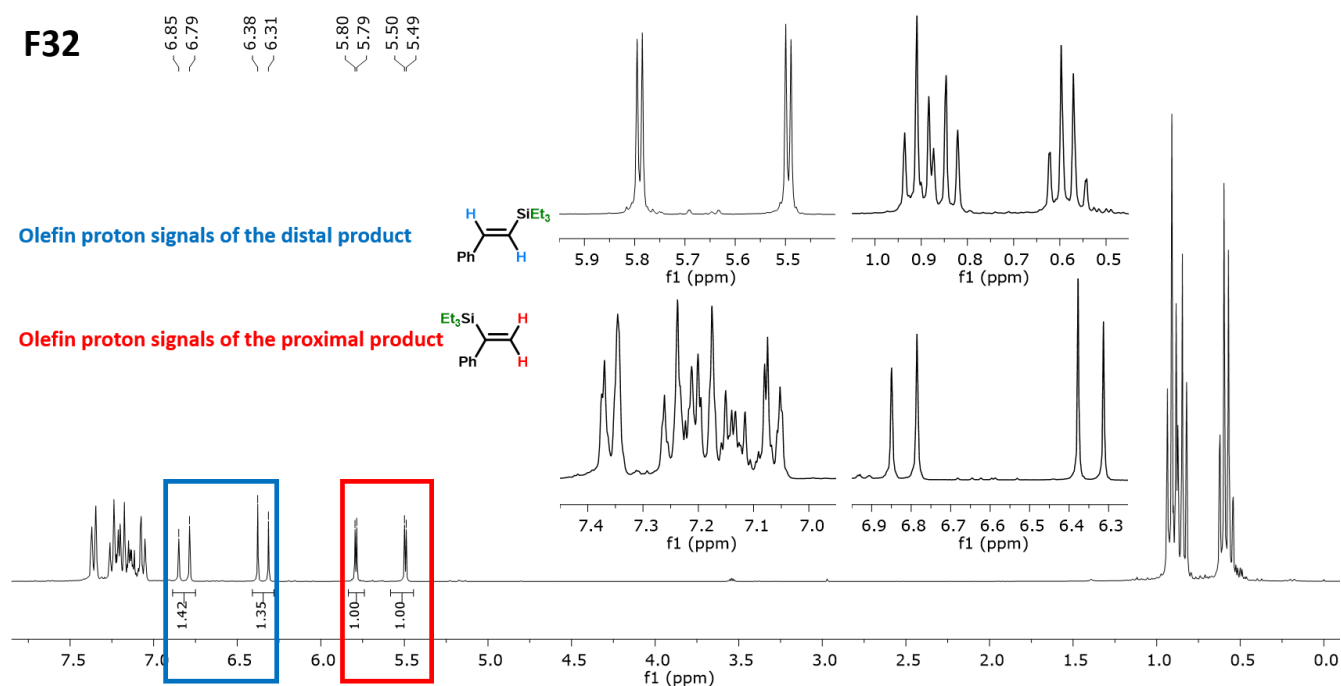

**Figure S29**  $^1\text{H}$  NMR spectrum (300.13 MHz,  $\text{CDCl}_3$ ) with expanded sections of the hydrosilylation product from sample F32. The conversion and the distal/proximal ratio obtained were 99% and 1.4, respectively.

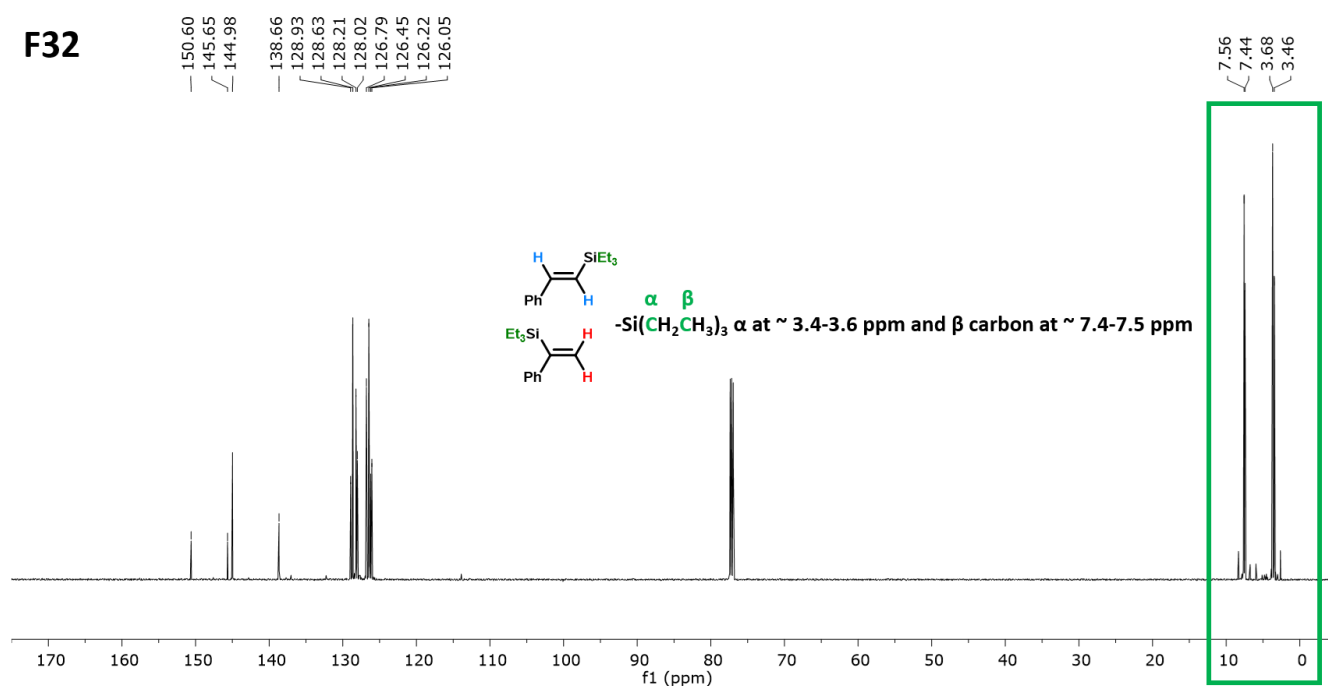

**Figure S30**  $^{13}\text{C}$  NMR spectrum (75.475 MHz,  $\text{CDCl}_3$ ) of the hydrosilylation product from sample F32. Carbon  $\alpha$  at  $\sim 3.4\text{--}3.6$  ppm and carbon  $\beta$  at  $\sim 7.4\text{--}7.5$  ppm. The two peaks each for  $\alpha$  and  $\beta$  are due to the distal and proximal products.

**S10 Gas chromatography (GC) analysis**

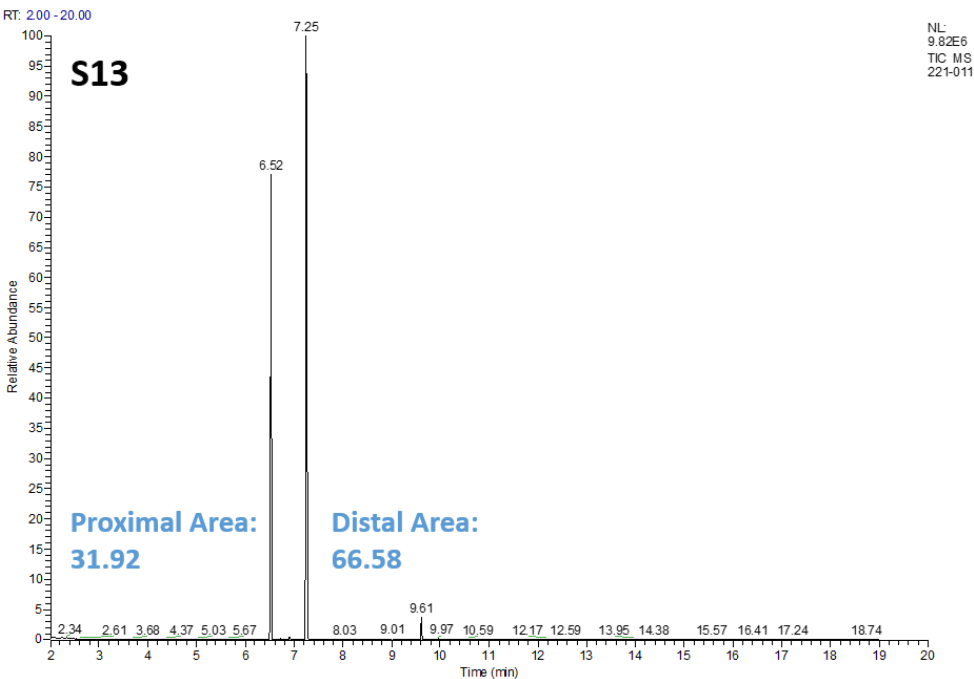

**Figure S31** Gas chromatogram of the hydrosilylation product from sample S13. The molar distal/proximal ratio was 2.1.

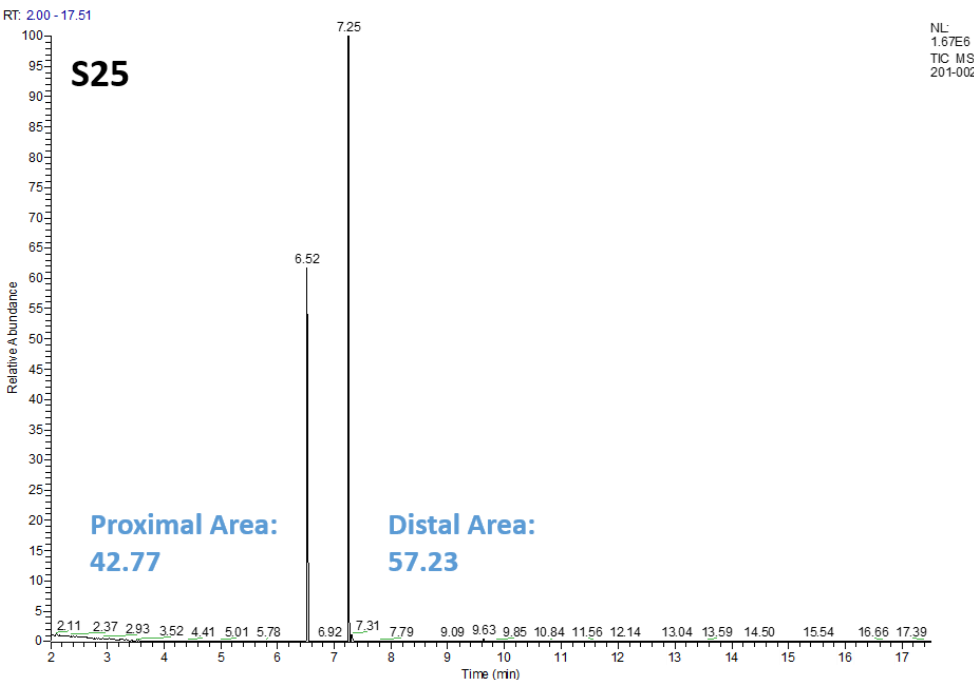

**Figure S32** Gas chromatogram of the hydrosilylation product from sample S25. The molar distal/proximal ratio was 1.3.

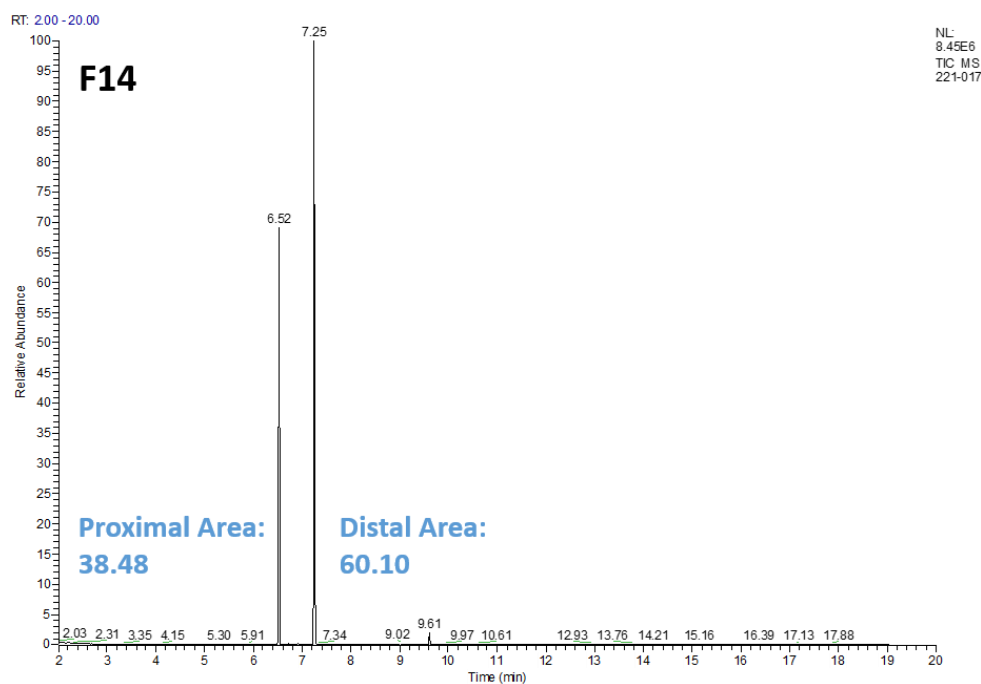

**Figure S33** Gas chromatogram of the hydrosilylation product from sample F14. The molar distal/proximal ratio was 1.6.

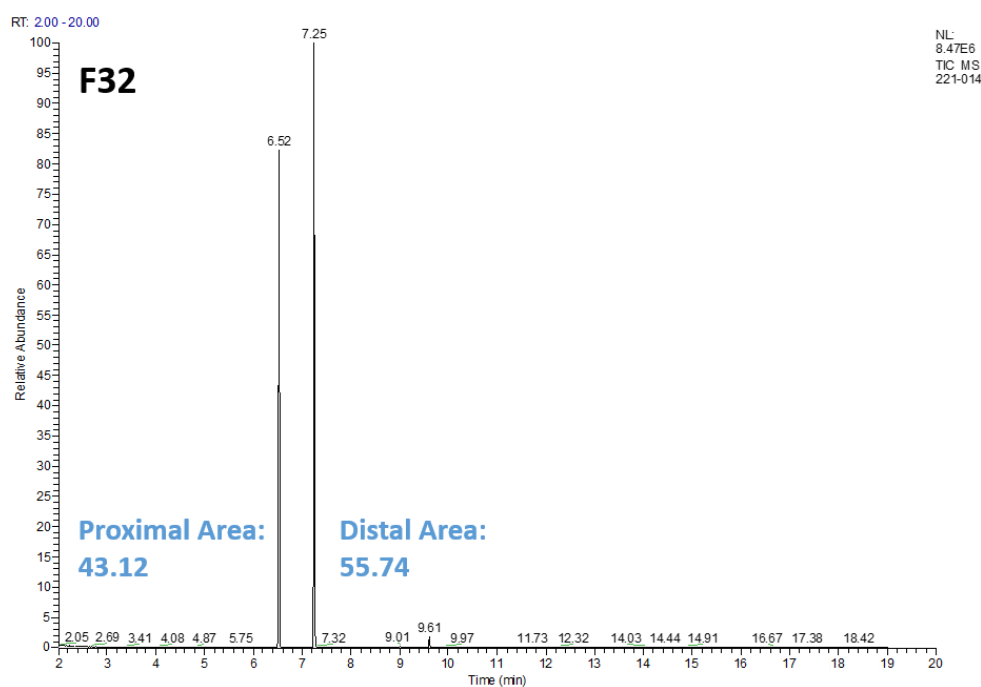

**Figure S34** Gas chromatogram of the hydrosilylation product from sample F32. The molar distal/proximal ratio was 1.3.

## References

- 42 Troegel, D.; Stohrer, J. Recent advances and actual challenges in late transition metal catalyzed hydrosilylation of olefins from an industrial point of view. *Coord. Chem. Rev.* **2011**, 255, 1440–1459. <https://doi.org/10.1016/j.ccr.2010.12.025>.
- 50 Chalk, A. J.; Harrod, J. F. Homogeneous Catalysis. II. The Mechanism of the Hydrosilylation of Olefins Catalyzed by Group VIII Metal Complexes 1. *J. Am. Chem. Soc.* **1965**, 87, 16–21. <https://doi.org/10.1021/ja01079a004>.

- 63 Chauhan, M.; Hauck, B. J.; Keller, L. P.; Boudjouk, P. Hydrosilylation of alkynes catalyzed by platinum on carbon. *J. Organomet. Chem.* **2002**, *645*, 1–13. [https://doi.org/10.1016/S0022-328X\(01\)01103-2](https://doi.org/10.1016/S0022-328X(01)01103-2).
- 70 Max, J.-J.; Chapados, C. Glucose and fructose hydrates in aqueous solution by IR spectroscopy. *J. Phys. Chem. A* **2007**, *111*, 2679–2689. <https://doi.org/10.1021/jp066882r>.
- 71 Yong, L.; Kirleis, K.; Butenschön, H. Stereodivergent Formation of Alkenylsilanes: syn or anti  
Hydrosilylation of Alkynes Catalyzed by a Cyclopentadienylcobalt(I) Chelate Bearing a Pendant  
Phosphane Tether. *Adv. Synth. Catal.* **2006**, *348*, 833–836. <https://doi.org/10.1002/adsc.200606028>.
